# 1 **Phylogeography reveals expansion of yellow fever virus genotypes in** 2 **West and Central Africa**

3  
4  
5  
6 Babatunde Olanrewaju Motayo<sup>1\*</sup>, Adewale Opayele<sup>2</sup>, Paul Akiniyi Akinduti<sup>3</sup>   
7 Adedayo Omotayo Faneye<sup>2</sup>, Isibor Patrick Omoregie<sup>3</sup>, Solomon Uche Oranusi<sup>3</sup>

- 8  
9  
10 1. Department of Medical Microbiology, Federal Medical Centre, Abeokuta, Nigeria.  
11 2. Department of Virology, College of Medicine, University of Ibadan, Nigeria.  
12 3. Department of Biological Sciences, Covenant University, Ota, Nigeria

13  
14  
15  
16 Correspondence\*: Babatunde O Motayo e-mail [babatundemotayo@yahoo.com](mailto:babatundemotayo@yahoo.com) ; Paul A  
17 Akinduti [niyiakinduti@gmail.com](mailto:niyiakinduti@gmail.com)

27

28

## 29 **ABSTRACT**

30 Yellow Fever virus remains the most medically significant Arbovirus in Africa, with the  
31 occurrence of large outbreaks with human fatalities in recent years in Africa. Molecular  
32 epidemiology has shown the presence of 4 genotypes circulating across Africa; however, paucity  
33 of data still exists regarding directional spread and phylogeography of the African Yellow fever  
34 genotypes. The need to fill this gap with information from spatiotemporal data from continuous  
35 occurrence of YF outbreaks in Africa conceptualized this study; which aims to investigate the  
36 most recent transmission events and directional spread of YF virus using updated genomic  
37 sequence data. Archived Yellow Fever sequence data was utilized along with epidemiologic  
38 data from outbreaks in Africa, to analyze the case/fatality distribution. Phylogeographic analysis  
39 was also utilized to demonstrate the ancestral introduction and geographic clustering of YF  
40 genotypes in Africa. Directional spread and geographic transmission of YF was also  
41 investigated. African YF genotypes were found to be geographical distinct, circulating within  
42 distinct geographical boundaries. Spatiotemporal spread however revealed an eastward spread of  
43 the West African genotypes over time, and recent northward movement of the East African  
44 genotype. We conclude by recommending expanded human/ vectoral surveillance of YF and  
45 other Arboviruses of public health importance, and upscaling sequencing capabilities of new and  
46 existing public health labs in Africa to help in the defense against public health threats.

47

48

49

## 50 **INTRODUCTION**

51 Yellow fever virus is the causative agent for yellow fever, a viral illness that affects mainly the  
52 liver, and may cause serious complications including hemorrhage and death [1]. It is a member  
53 of the family Flaviviridae, genus flavivirus, along with Dengue virus, West Nile virus and  
54 Japanese encephalitis virus. It is an enveloped virus with a single stranded positive-sense RNA  
55 genome of 11kb size, that encodes a single polyprotein that is cleaved into 3 structural proteins,  
56 envelope (E), matrix (M), and capsid proteins (C) and 7 non-structural proteins, NS1, NS2A,  
57 NS2B, NS3, NS4A, NS4B, and NS5 [2]. Yellow fever is an arthropod borne infection,  
58 maintained by the mosquito vector *Aedes aegypti*, and *Aedes albopictus*, although several  
59 vectorial studies have identified YF virus in other mosquitoes' species, such as *Aedes taylori* [3].  
60 The main vector of the YF virus is also capable of transmitting other viral infections such as  
61 Chikungunya (CHIK), Dengue (DENV) and Zika (ZIKV) in tropical and sub-tropical areas [3].

62 There are two major vectorial cycles of YF, the sylvatic also known as Jungle YF maintained in  
63 non-human primates (NHP) by the mosquito *Heamgogus spp* [4], the second cycle is the urban  
64 cycle where humans are the primary host and are transmitted by the peri urban mosquito *Aedes*  
65 *aegypti* [3].

66 Yellow fever virus has one serotype, but phylogenetic analysis has identified up to 5 genotypes  
67 West Africa genotype I, East Africa genotype, East Africa/Angolan genotype, South American  
68 genotype I and South American genotype II [5]. Previous genetic analysis has shown that these  
69 genotypes are geographically defined [6], as have been reported for other viruses [7-9]. Previous  
70 reports have also shown the likelihood of YF virus originating from around East Africa before  
71 emerging in West Africa. Also, majority of the studies carried out in Africa are directed towards  
72 outbreak investigation and genotype identification [6], only very few studies have attempted to  
73 investigate spatio temporal dynamics of YF in Africa [6, 10]. In a previous study West African  
74 YF sequences were shown to be more divergent with evidence of adaptive evolution to the  
75 sylvatic environment [10]. In another study, the phylogeography of YF showed stable population  
76 demography, regional confinement of genotypes and zoonotic spillovers from the sylvatic  
77 outbreaks in Africa [11]. Yellow fever outbreaks continue to occur in Africa despite availability  
78 of vaccine and mass deployment to at risk regions in various African countries [12]. For  
79 instance, between 2017 to 2022 there have been outbreaks of YF in 4 different states in Nigeria,  
80 with a total of 287 confirmed cases [13,14]. Outbreaks have also been reported in Senegal in  
81 2020 with 542 suspected cases and 15 laboratory confirmed cases [15]. There have also been  
82 silent outbreaks in Nigeria, with a report among patients presenting with pyrexia of unknown  
83 origin [16].

84 The continuous reports of outbreaks of YF virus in different parts of Africa, despite  
85 implementation of mass vaccination campaigns calls for attention and motivated the  
86 conceptualization of this study. The current study was designed to investigate the relationship  
87 between YF field surveillance data and available genomic data to the continuous occurrence of  
88 outbreaks in Africa; as well as most recent geographic transmission events of Yellow Fever virus  
89 genotypes using updated sequence data.

90

## 91 **METHODS**

### 92 **Data curation**

93 Data relating to all reported outbreaks of yellow fever virus infections were collected after  
94 database search. The databases that were searched include PubMed, Scopus and Google Scholar.  
95 Supplementary Table 1 shows the list of Outbreaks with the corresponding articles they were  
96 reported in. Figure 1 shows a world map and with an enlarged map of Africa, with the names of  
97 countries labelled within each country's geographical locations.

98 Partial YF, E gene sequences from Africa were downloaded from GenBank, along with  
99 sequences that were recovered from returnee traveler from Angola to China after the 2016  
100 Angolan YF outbreak that spread to China via international travel [17]. This was done with the  
101 help of the NCBI Virus database. The dataset consisted of genome sequences of all archived E  
102 gene sequences from Africa, along with whole genome sequences deposited in GenBank, the E  
103 gene was selected because it represents the most frequently and consistently sequenced gene  
104 region for YF virus. In addition to the sequence data, metadata was also extracted such as sample  
105 source, year of isolation, and Country Location of isolation.

## 106 **Demographic analysis**

107 The number of reported cases and subsequent deaths of infected individuals according to  
108 Country and year, were retrieved from the published reports of YF outbreaks in Africa. This data  
109 was tabulated and visualized on a global map using R studio (<https://www.r-project.org>). A bar  
110 representing African YF cases and deaths according to year of occurrence and Country was also  
111 generated in R studio (<https://www.r-project.org>). The methods employed in this report has been  
112 published as a preprint in MedRxiv (<https://www.medrxiv.org/node/690912.full>).

113

## 114 **Phylogenetic analysis**

115 Partial genome sequences downloaded from GenBank were aligned using MAFFT v7.222 (FF-  
116 NS-2 algorithm) following default settings [18]. The dataset consisted genome sequences from  
117 Africa available in GenBank as at 1<sup>st</sup> February 2023, along with representative sequences from  
118 the Southern America (n =220). Maximum likelihood phylogenetic analysis was performed using  
119 the general time reversible nucleotide substitution model after automatic model testing with  
120 gamma distributed rate variation GTR- $\Gamma$ [19] with 1000 bootstrap replicates using IQ-TREE  
121 software [20]. The pairwise amino acid distances of the African YF sequences were analyzed in  
122 reference to the prototype vaccine Asibi strain (GenBank no: AY640589.1) using MEGA 7 (21).

## 123 **Phylogeography and Evolutionary analysis**

124 Evolutionary and additional phylogenetic analysis was carried out on African YF strains, using a  
125 Bayesian evolutionary approach using Markov Chain Monte Carlo (MCMC) implemented in  
126 BEAST version 2.5 [22]. The strength of the temporal clock signal of the dataset was carried out  
127 by conducting a regression of root to tip genetic distances against year of sampling analysis  
128 using TempEst v 1.5 [23]. For the MCMC run, a total of 110 YF virus partial E gene sequences  
129 of 280 nucleotides in length were aligned, consisting 91 African sequences and 19 Chinese  
130 sequences from the international outbreak in 2016. A list of the sequences used for the analysis is  
131 contained in supplementary table 2. Further analysis was then done using the strict clock with  
132 coalescent Bayesian Skyline prior. The MCMC run was set at 100,000,000 states with a 10%  
133 burn in. Results were visualized in Tracer version 1.8. (<http://tree.bio.ed.ac.uk/software/tracer/>).

134 Bayesian skyride analysis was carried out to visualize the epidemic evolutionary history using  
135 Tracer v 1.8. (<http://tree.bio.ed.ac.uk/software/tracer/>).

136 Geographical coordinates of the locations of the African YF sequences were retrieved from the  
137 web with the help of online servers. A phylogeographic tree with discrete traits was constructed  
138 using the African YF sequences and their geographic coordinates in latitude and longitude using  
139 a Bayesian stochastic search variable selection (BSSVS) model implemented in BEAST 2.5 [22].  
140 The resulting tree was annotated in TreeAnnotator after discarding a 10% burn-in. In addition, a  
141 continuous phylogeographic tree was also constructed for major African YF genotypes,  
142 according to their regions of circulation, WA-I/II, and EA-1/EA-II-Angolan genotypes, using a  
143 similar approach for the discrete tree except that a continuous tree trait was selected in creating  
144 the BEAST XML file in Beauti. The resulting MCC trees were visualized in ggtree [24].

### 145 **Geographic dispersal**

146 The transmission histories and geographic dispersal was projected using the Phylogeographic  
147 trees (Continuous and Discrete) were loaded unto an online software sever where information  
148 such as internal node ages, user determined geographic coordinates e.t.c. and maps these to a  
149 world geographic map. rendered into SPREAD4 [25].

150

## 151 **RESULTS**

### 152 **Yellow fever outbreak Demography**

153 African Yellow fever demography was re-evaluated with updated data from recent literature [13,  
154 26]. There were also silent outbreaks identified from molecular detection from patients with  
155 pyrexia of unknown origin in Nigeria [16]. From our analysis, Nigeria remains the country with  
156 highest number of cases, with Ethiopia having the least number of cases (Figure 2 top). The case  
157 fatality distribution shows that high mortality rates were recorded between 1984 and 1987 Figure  
158 2 bottom, with majority of cases arising from Nigeria, Angola and Ghana Supplementary table 1.

### 159 **Phylogeography and Evolution**

160 Global phylogeny of YF virus revealed that the African viruses clustered within the four major  
161 genotypes West African genotype I (WA-I), West African genotype II (WA-II), East African  
162 genotype (EA), Angolan genotype or East African genotype II (EA-II). Majority of the African  
163 strains fell under the WA-II, while WA-I had the lowest number of viral sequences as shown in  
164 Figure 3. There was strict geographic defined phylogenetic diversification as shown by  
165 continental clustering of the viruses analyzed in our study with the South American strains  
166 clustering within the South American genotype and African strains within the African genotypes.  
167 The amino acid divergence of the African YF partial E gene sequences ranged between 0% to

168 5.9%, with the recently isolated West African genotypes displaying very low diversity, while the  
169 older East African genotypes having between 1.2% to 5.9% (Supplementary table 3).

170 The root to tip divergence for the African YF sequences showed a positive signal, with  $R^2 = 0.11$   
171 (Figure 4A). The MCC tree of the African YF isolates showed a similar diversification with the  
172 global tree with Senegalese isolates being the most abundant and diversely distributed within both  
173 WA-I and WA-II genotype sub-clades (Figure 4 bottom). The evolutionary rate of the African  
174 YF viruses was  $2.08 \times 10^{-4}$ , 98% HPD ( $8.48 \times 10^{-5} - 3.41 \times 10^{-3}$ ) substitutions/ site/ year. The  
175 time calibrated MCC tree also showed ancestral divergence times for each ancestral node with  
176 the earliest ancestor dating back as the year 1140. The WA-I genotype had a time to most recent  
177 ancestor TMRCA of 1845, 95% HPD (1795 – 1890), while WA-II had a TMRCA of 1852, 95%  
178 HPD (1790 – 1910). The EA genotype on the other hand had a TMRCA of 1760, 95% HPD  
179 (1655 – 1850), and EA-II 1940, 95% HPD (1900 – 1970). Other ancestral nodes for the  
180 genotypes, particularly WA genotypes displayed high posterior support. The viral population of  
181 the African sequences had no population growth between 1930 to 1970 but exhibited a state of  
182 equilibrium, a sharp decline in effective viral population was however observed between 1980 to  
183 the most recent sampling date (Supplementary Figure 1).

#### 184 **Yellow fever virus geographic dispersal**

185 We explored the pattern of geographic dispersal and viral circulation of YF virus within Africa  
186 using both discrete and continuous phylogeographic reconstructions. The discrete model clearly  
187 showed major transmission routes between East and West Africa. West African countries of  
188 Senegal, Burkina Fasso, and Mauritania all seemed to have outbound transmission linkages to  
189 other countries, majorly in East and Central Africa. The strongest transmission links visualized  
190 as the width of the connecting cords were seen between, Senegal and DRC, Cote d'Ivoire and  
191 Angola, and Mauritania and Angola (Figure 5). The phylogeographic movement seemed to be  
192 predominantly from West to East Africa, with only few transition events moving out of East  
193 Africa to West African countries. For our continuous phylogeography we ran independent  
194 analysis on each the two prevailing genotypes of West Africa and East Africa, giving us two  
195 independent results. Our analysis was designed to identify specific viral introductions and spread  
196 events from historically endemic areas through time (Figure 6A and 6B). In Figure 6A the  
197 continuous spatial dispersion of YF West African genotypes (WAI and WAI), shows that  
198 between 1960 and 1980, YF fever spread from Senegal and Mali eastwards into countries such as  
199 Nigeria, Ghana, and as far as DRC (Figure 6A). There was also transmission from Nigeria  
200 eastwards into Cote d'Ivoire showing some eastward movement as well. The most recently  
201 observed transmission route was however, from Ghana into Cameroon and from Ghana back into  
202 Nigeria occurring between 1980 to 2021. For the East African genotypes shown in Figure 6B,  
203 the epicenter of the EA YF spread was around the DRC and between 1750 and 1910, the  
204 genotype was spatially dispersed into majorly East and Central African countries such as Angola,  
205 Uganda and Kenya. The most recent special movement of the EA genotype were upward from  
206 the DRC into Ethiopia and Sudan, between 1910 and 2010.



207

208

209

## 210 **DISSCUSION**

### 211 **General and Molecular Epidemiology**

212 Yellow fever virus was first reported in America around the 15<sup>th</sup> century by Spanish conquerors,  
213 but historical and molecular evidence indicates that the virus first originated in Africa where it  
214 was imported into the Americas through the trans-Atlantic slave trade [10, 27], ever since then  
215 there has been several large outbreaks in mostly West Africa and parts of Central Africa [28].  
216 Yellow fever virus was first isolated from the blood of a Ghanian man called Asibi in 1927 [29].  
217 Epidemiological data from previous outbreaks, between 1960 and 2022 reviewed in our study  
218 indicates a fluctuating pattern of intermittent outbreaks with its peak at between 1986 and 1988  
219 (Figure 1b). There was also an upsurge in cases resulting from a large outbreak in Angola in  
220 2015, which spilled over into the Democratic Republic of Congo, followed by Uganda 2016. It is  
221 presumed that certain social drivers were largely responsible for this re-emergence of large  
222 epidemics in East Africa, these include long term conflict among waring rebels and government  
223 forces, human population displacement resulting from conflicts, and improved surveillance  
224 activity.

225 Molecular epidemiology of the YF virus was consistent with previous reports [6, 30, 31]. With  
226 the African sequences maintaining their geographically defined genotypes (Figure 3). There was  
227 one West African genotype II reported from the Central African Republic GenBank accession  
228 number GU073130. The virus was isolated from a mosquito in 1974 in Central African Republic,  
229 an indication that the WA-II genotype might have been circulating and maintained in the forests  
230 of CAR. The EA genotypes I and II were strictly maintained in their geographical region. The  
231 majority of the recent sequences were of WA-II, with the genotype dominating the Entire West  
232 Africa and parts of Central Africa. The evolutionary rate of  $2.08 \times 10^{-4}$  is lower that of a  
233 previous report in Africa of  $2.8 \times 10^{-4}$  [11]. Our result is also lower than that of a study of  
234 Brazilian YF isolates of  $3.1 \times 10^{-4}$  [32], but is consistent with that of Sall et al [30] which gave  
235  $2.10 \times 10^{-4}$ . This shows that the possible mutation rate of YF virus has remained fairly stable  
236 through the years in Africa, and is probably slower than isolates causing outbreaks in South  
237 Africa.

### 238 **Phylogeography and transmission dynamics**

239 There is a paucity of data regarding special epidemiology of Infectious agents in Africa, recent  
240 reports from West Africa have shown the significance of molecular biogeography and special  
241 epidemiology in tracking rapidly expanding infectious agents within West Africa [33-35].

242 Yellow fever phylogeography have consistently showed a distinct geographically bound  
243 diversification [6, 30, 36]. Our present study maintains the same regional clustering of the West  
244 African genotypes and the East/Central African genotype as well as the Angolan genotype. The  
245 more recent sequences isolated from Nigeria in 2018, clustered within WA-II, having a common  
246 ancestral history as other closely related isolates, sharing the same sub-clade with isolates from  
247 Senegal, Cameroon, and Burkina Fasso. This observation shows strict geographical conservation  
248 probably due to the fact that same genotype has established itself within the Forests and  
249 grasslands of Nigeria all the way to Senegal. Previous studies have hypothesized that sustained  
250 epizootic transmission cycles within forested regions of Africa have led to YF virus adaptation to  
251 its intermediate host NHP and its competent vector *Heamagogous spp* [6]. Also, the fact that  
252 humans act as a dead-end host leaves little opportunity for intra-host evolution and diversity  
253 among human population. Previous reports have identified key mutational features among  
254 African YF isolates that confer a positive selection pressure and may play a role in genotype  
255 emergence [10, 36]. The EA-I and the EA-II/Angolan genotypes were in conformity with  
256 previously reported geographically defined diversity [6, 30]. The most recently identified strains  
257 from outbreak in Angola and Uganda 2015/2016 clustered within separate genotypes.

258 Discrete phylogeography showed active transmission routes within both West Africa and East  
259 Africa and between both regions. This is an indication of sustained intra-regional transmission as  
260 well as trans regional transmission resulting from constant human movement between West and  
261 Central Africa. This observation serves as evidence that YF transmission dynamics is not just  
262 influenced by ecological drivers and climatic events that may affect the Forest /Savanah  
263 ecosystem as previously reported [37-39], but also by human activity such as international trade  
264 and human migration. Continuous phylogeography revealed a gradual temporal spread among  
265 the genotypes within their regions of primary emergence. The WA genotypes seemed to have  
266 stronger migration events compared to the EA genotypes. The WA genotypes displayed a  
267 eastward movement cutting across more than 4 countries within the space of just 40 years from  
268 Senegal, Mali axis all the way to Camerron as far east as Angola. This very fast spread of the  
269 WA genotype may not be unconnected with the rich vegetation across the region and the  
270 successful adaptation of the principal insect vector *aedes egypti* to the urban environment of the  
271 cities of West Africa. The EA genotype however displayed a much slower spread rate, with its  
272 spread event mainly localized within the Central/East African regions. Although there were very  
273 recent introductions northward to Sudan and Ethiopia, this seems to have occurred as isolated  
274 incidents. Our results in this study affirms that vegetation plays a vital role in the geographic  
275 spread of YF across Africa as there was limited Northward geographic movement of the WA  
276 genotypes (Figure 6a). The EA/Angolan genotypes seemed to be restricted in their dispersal  
277 activity within the East/Central African region, although some northward movement was  
278 observed with spread events into Sudan and Ethiopia, these were just probably isolated  
279 occurrences arising from local outbreaks from Sylvatic/Sahvana YF cycle spillovers into human  
280 habitation areas.



## 281 CONCLUSION

282 This study reports the most current data on YF virus phylogeography and transmission dynamics.  
283 We have shown that YF virus maintain a strict geographically bound lineage dispersal pattern,  
284 with major genotypes circulating within strict regional confines. We also report a major surge in  
285 reported laboratory confirmed cases majorly in East Africa, after the year 2015. There was also  
286 rapid expansion of the WA-II genotype in the last 4 years. Study limitations include poor  
287 genomic surveillance system across Africa, resulting in limited amount of YF sequence data  
288 available in open-source data banks. We therefore recommend expanded human and vectoral  
289 surveillance of YF outbreaks as well as other Arboviruses of public health importance. We also  
290 advocate for upscaling Molecular biology capabilities of existing public health labs both  
291 Nationally and regionally to enable rapid genomic sequencing and analysis of samples from  
292 Arboviral outbreaks such as YF to help in prevention of future epidemics and protect Africa  
293 from existing biological threats.

294

## 295 FIGURE LEGENDS

296 **Figure 1** World map with various continents in color, and a map of Africa showing the different  
297 countries. The legend of the world map shows the color code for continents.

298 **Figure 2A** Geographic distribution of YF virus cases across Africa, color intensity is  
299 representative of the number of confirmed YF cases in each country and is displayed as a color  
300 gradient by the side of the map. **Figure 2B** Geographic distribution of YF virus deaths in Africa,  
301 color intensity is representative of the number of confirmed YF deaths in each country and is  
302 displayed as a color gradient. **Figure 2C** Bar charts showing the number of confirmed Yellow  
303 Fever cases from 1970 to 2021 according to Country. The legend is color coded to represent the  
304 various countries where outbreaks occurred. **2D** Bar charts showing the number of confirmed  
305 Yellow Fever deaths from 1970 to 2021 according to Country. The legend is color coded to  
306 represent the various countries where outbreaks occurred.

307 **Figure 3.** Maximum Likelihood tree of African Yellow Fever isolates along with some global  
308 reference sequences. The clades representing the various genotypes are shown as colored rings,  
309 the bootstrap values are shown as circles around the ancestral nodes with the sizes if the circles  
310 representing the percentage bootstap values. The root of the tree is at the mid-point. The legend  
311 represents the various global YF genotypes.

312 **Figure 4A.** Root to tip regression analysis of African Yellow Fever sequences, represented by a  
313 scatterplot with a regression line of best fit, shaded portion of the line is the 95% posterior  
314 probability. **4B** Time resolved phylogeographic tree of African Yellow virus E gene sequences,  
315 showing the various Countries of origin as tips. The genotypes are represented by colors bars at  
316 the ancestral nodes of each genotype in the tree. The red bar represents West Africa genotype II

317 (WAI), the yellow bar represents WA, the sky-blue bar represents the Angolan genotype, while  
318 the purple bar represents the East African genotype (EA).

319 **Figure 5.** Spatiotemporal diffusion with discrete traits of Yellow Fever virus in Africa after  
320 phylogeographic analysis, visualized as a chord plot with the thickness of the connecting chords  
321 representing the strength of the geographic linkages between the countries in Bayes Factor (BF).

322 **Figure 6A.** Continuous phylogeography of West African Yellow Fever genotypes, shaded blue  
323 circles represent 80% highest posterior density interval of the respective nodes of the MCC tree.  
324 Directionality of the movements is downward curve left to rightward movement; upward curve is  
325 right to leftward movement. **6B.** Continuous phylogeography of East African/Angolan Yellow  
326 Fever genotypes, shaded blue circles represent 80% highest posterior density interval of the  
327 respective nodes of the MCC tree.

328

## 329 **FINANCIAL DISCLOSURE**

330 The authors did not receive any funding or financial support for this project.

## 331 **CONFLICT OF INTEREST**

332 The authors declare that there are no conflicts of interest regarding the publication of the paper.

## 333 **DATA AVAILABILITY STATEMENT**

334 The data used in this study is freely available on GenBank and their information is also available  
335 as a supplementary table.

336

337

338

339

## 340 **REFERENCES**

- 341 1. Monath TP, Vasconcelos PFC. Yellow fever. *Journal of Clinical Virology*. 2015;64: 160–  
342 173. [10.1016/j.jcv.2014.08.030](https://doi.org/10.1016/j.jcv.2014.08.030).
- 343 2. Beasley D.W., McAuley A.J., Bente D.A. Yellow fever virus: Genetic and phenotypic  
344 diversity and implications for detection, prevention and therapy. *Antivir. Res.*  
345 2015;115:48–70. doi: [10.1016/j.antiviral.2014.12.010](https://doi.org/10.1016/j.antiviral.2014.12.010).
- 346 3. Gould EA, de Lamballerie X, Zanotto PM, Holmes EC. 2003. Origins, evolution, and  
347 vector/host coadaptations within the genus *Flavivirus*. *Adv. Virus Res.* 59:277–314.

- 348 4. Vasconcelos PFC, Sperb AF, Monteiro HAO, Torres MAN, Sousa MRS, Vasconcelos  
349 HB, Mardini LB, Rodriguez SG. Isolations of yellow fever virus from *Haemagogus*  
350 *leucocelaenus* in Rio Grande do Sul State, Brazil. *Transactions of the Royal Society of*  
351 *Tropical Medicine and Hygiene*. 2003; 97: 60–62.
- 352 5. Chang, G. J., Cropp, B. C., Kinney, R. M., Trent, D. W., & Gubler, D. J. Nucleotide  
353 sequence variation of the envelope protein gene identifies two distinct genotypes of  
354 yellow fever virus. *Journal of virology*, 1995.69(9), 5773–5780.
- 355 6. Mutebi, J. P., Wang, H., Li, L., Bryant, J. E., & Barrett, A. D. Phylogenetic and  
356 evolutionary relationships among yellow fever virus isolates in Africa. *Journal of*  
357 *virology*, 2001.75(15), 6999–7008. doi:10.1128/JVI.75.15.6999-7008.2001.
- 358 7. Siddle, K. J., Eromon, P., Barnes, K. G., Mehta, S., Oguzie, J. U., Odia, I., Schaffner, S.  
359 F., Winnicki, S. M., Shah, R. R., Qu, J., Wohl, S., Brehio, P., Iruolagbe, C., Aiyepada, J.,  
360 Uyigue, E., Akhilomen, P., Okonofua, G., Ye, S., Kayode, T., Ajogbasile, F., ... Happi,  
361 C. T. Genomic Analysis of Lassa Virus during an Increase in Cases in Nigeria in 2018.  
362 *The New England journal of medicine*, 2018. 379(18), 1745–1753.  
363 doi:10.1056/NEJMoa1804498.
- 364
- 365 8. Carroll, M. W., Matthews, D. A., Hiscox, J. A., Elmore, M. J., Pollakis, G., Rambaut, A.,  
366 Hewson, R., García-Dorival, I., Bore, J. A., Koundouno, R., Abdellati, S., Afrough, B.,  
367 Aiyepada, J., Akhilomen, P., Asogun, D., Atkinson, B., Badusche, M., Bah, A., Bate, S.,  
368 Baumann, J., ... Günther, S. Temporal and spatial analysis of the 2014-2015 Ebola virus  
369 outbreak in West Africa. *Nature*, 2015. 524(7563), 97–101. doi:10.1038/nature14594.
- 370
- 371
- 372 9. Motayo, B. O., Oluwasemowo, O. O., Olusola, B. A., Opayele, A. V., & Faneye, A. O.  
373 Phylogeography and evolutionary analysis of African Rotavirus a genotype G12 reveals  
374 district genetic diversification within lineage III. *Heliyon*, 2019. 5(10), e02680.  
375 doi:10.1016/j.heliyon.2019.e02680.
- 376
- 377 10. Stock NK, Laraway H, Faye O, Diallo M, Niedrig M, Sall AA. 2013. Biological and  
378 Phylogenetic Characteristics of Yellow Fever Virus Lineages from West Africa. *J*  
379 *Virol* 87:<https://doi.org/10.1128/jvi.01116-12>.
- 380
- 381 11. Beck A, Guzman H, Li L, Ellis B, Tesh RB, Barrett ADT (2013) Phylogeographic  
382 Reconstruction of African Yellow Fever Virus Isolates Indicates Recent Simultaneous  
383 Dispersal into East and West Africa. *PLoS Negl Trop Dis* 7(3): e1910.
- 384
- 385
- 386 12. WHO Countries with risk of yellow fever transmission and countries requiring yellow  
387 fever vaccination.2020. [https://www.who.int/publications/m/item/countries-with-risk-of-](https://www.who.int/publications/m/item/countries-with-risk-of-yellowfever-transmission-and-countries-requiring-yellow-fever-vaccination-(july-2020))  
388 [yellowfever-transmission-and-countries-requiring-yellow-fever-vaccination-\(july-2020\)](https://www.who.int/publications/m/item/countries-with-risk-of-yellowfever-transmission-and-countries-requiring-yellow-fever-vaccination-(july-2020)).
- 389 13. Nomhwange, T., Jean Baptiste, A. E., Ezebilo, O., Oteri, J., Olajide, L., Emelife, K.,  
390 Hassan, S., Nomhwange, E. R., Adejoh, K., Ireye, F., Nora, E. E., Ningi, A., Bathondeli,

- 391 B., & Tomori, O. The resurgence of yellow fever outbreaks in Nigeria: a 2-year review  
392 2017-2019. *BMC infectious diseases*, 2021. 21(1), 1054. [https://doi.org/10.1186/s12879-](https://doi.org/10.1186/s12879-021-06727-y)  
393 [021-06727-y](https://doi.org/10.1186/s12879-021-06727-y).
- 394 14. Nwachukwu WE, Oladejo J, Ofoegbunam CM, Anueyiagu C, Dogunro F, Etiki SO,  
395 Dachung BI, Obiekea C. Epidemiological description of and response to a large yellow  
396 fever outbreak in Edo state Nigeria, September 2018 - January 2019. *BMC Public Health*.  
397 2022. 22(1):1644. doi: 10.1186/s12889-022-14043-6.
- 398 15. Dieng, I., Diallo, A., Ndiaye, M., Mhamadi, M., Diagne, M. M., Sankhe, S., Ndione, M.  
399 H. D., Gaye, A., Sagne, S. N., Heraud, J. M., Sall, A. A., Fall, G., Loucoubar, C., Faye,  
400 O., & Faye, O. Full genome analysis of circulating DENV-2 in Senegal reveals a regional  
401 diversification into separate clades. *Journal of medical virology*, 2022. 94(11), 5593–  
402 5600.
- 403 16. Ajogbasile, F. V., Oguzie, J. U., Oluniyi, P. E., Eromon, P. E., Uwanibe, J. N., Mehta, S.  
404 B., Siddle K. J., Odia I, Winnicki S. I, Akpede N, Akpede G, Okogbenin S, Ogbaini-  
405 Emovon E, MacInnis B.L, Folarin O.A, Modjarrad K, Schaffner S.F, Tomori  
406 O, Ihekweazu C, Sabeti P. C, Happi C. T. Real-time Metagenomic Analysis of  
407 Undiagnosed Fever Cases Unveils a Yellow Fever Outbreak in Edo State, Nigeria.  
408 *Scientific reports*, 2020. 10(1), 3180. <https://doi.org/10.1038/s41598-020-59880-w>.
- 409 17. Li C, Li D, Smart S.J, Zhou L, Yang P, Ou J. Evaluating the importation of Yellow  
410 Fever cases into China in 2016 and strategies used to prevent and control the spread of  
411 the disease. 2020. *WPSAR*. 11(2): doi: 10.5365/wpsar.2018.9.1.007.
- 412 18. Katoh K, Misawa K, Kuma K, Miyata T, MAFFT: a novel method for rapid multiple  
413 sequence alignment based on fast Fourier transform, *Nucleic Acids Research*, Volume 30,  
414 Issue 14, 15 July 2002, Pages 3059–3066.
- 415 19. Yang Z. Estimating the pattern of nucleotide substitution. *Journal of molecular*  
416 *evolution*, 1994. 39(1), 105–111.
- 417 20. Nguyen, L.T.; Schmidt, H.A.; von Haeseler, A.; Minh, B.Q. IQ-TREE: A fast and  
418 effective stochastic algorithm for estimating maximum-likelihood phylogenies. *Mol.*  
419 *Biol. Evol.* 2015. 32, 268–274. <https://doi.org/10.1093/molbev/msu300>
- 420
- 421 21. Kumar S, Stecher G, and Tamura K. *Molecular Biology and Evolution*. 2016. 33:1870-  
422 1874
- 423 22. Bouckaert R., Vaughan T.G., Barido-Sottani J., Duchêne S. BEAST 2.5: An advanced  
424 software platform for Bayesian evolutionary analysis. *PLoS computational biology*, 2019.  
425 15(4), e1006650. doi:10.1371/journal.pcbi.1006650.
- 426
- 427 23. Rambaut, A. Lam, T.T. Carvalho, L.M. Pybus, O.G. Exploring the temporal structure of  
428 heterochronous sequences using TempEst (formerly Path-O-Gen). *Virus Evol.* 2020. 2,  
429 vew007.

- 430 24. Yu, G., Smith, D. K., Zhu, H., Guan, Y. & Lam, T.T.-Y. ggtree: An r package for  
431 visualization and annotation of phylogenetic trees with their covariates and other  
432 associated data. *Methods Ecol. Evol.* 2017. 8, 28–36.  
433
- 434 25. Nahata, K. D., Bielejec, F., Monetta, J., Dellicour, S., Rambaut, A., Suchard, M. A.,  
435 Baele, G., & Lemey, P. SPREAD 4: online visualisation of pathogen phylogeographic  
436 reconstructions. *Virus evolution*, 2022. 8(2), veac088.  
437 <https://doi.org/10.1093/ve/veac088>.  
438 26. World Health Organization. Yellow fever situation report, 9 June 2016.  
439 <http://www.who.int/emergencies/yellow-fever/situation-reports/9-june-2016/en/>  
440
- 441 27. White C.R. Yellow fever; history of the disease in the eighteenth and nineteenth century.  
442 *J. Kans. Med. Soc.* 1959. 60:298–302.  
443
- 444 28. Chippaux J.P., Chippaux A. Yellow fever in Africa and the Americas: A historical and  
445 epidemiological perspective. *J. Venom. Anim. Toxins. Incl. Trop. Dis.* 2018. 24:20.  
446 doi: 10.1186/s40409-018-0162-y.
- 447 29. Staples, J. E., & Monath, T. P. (2008). Yellow fever: 100 years of discovery. *JAMA*,  
448 300(8), 960–962. <https://doi.org/10.1001/jama.300.8.960>.  
449 30. Sall AA, Faye O, Diallo M, Firth C, Kitchen A, Holmes EC. Yellow fever virus exhibits  
450 slower evolutionary dynamics than dengue virus. *J Virol.* 2010. 84(2):765-772.
- 451 31. Grobbelaar, A. A., Weyer, J., Moolla, N., Jansen van Vuren, P., Moises, F., & Paweska,  
452 J. T. Resurgence of Yellow Fever in Angola, 2015-2016. *Emerging infectious diseases*,  
453 2016. 22(10), 1854–1855.
- 454 32. Nunes MRT, Palacios G, Cardoso JF, Martins LC, Sousa EC, de  
455 Lima CPS, Medeiros DBA, Savji N, Desai A, Rodrigues SG, Carvalho VL, Lipkin WI, Va  
456 sconcelos PFC. 2012. Genomic and Phylogenetic Characterization of Brazilian Yellow  
457 Fever Virus Strains. *J Virol* 86: <https://doi.org/10.1128/jvi.00565-12>.  
458
- 459 33. Motayo B.O, Oluwasemowo O.O, Akinduti P.A. Evolutionary dynamics and geographic  
460 dispersal of beta coronaviruses in African bats. *PeerJ*. 2020. 8:e10434. 26.  
461 doi:10.7717/peerj.10434.
- 462 34. Akinduti P.A, Ayodele O, Motayo BO, Obafemi YD, Isibor PO, Aboderin OW. Cluster  
463 analysis and geospatial mapping of antibiotic resistant *Escherichia coli* O157 in  
464 southwest Nigerian communities. *One Health*. 2022;15:100447.  
465 doi:10.1016/j.onehlt.2022.100447.
- 466 35. Akinduti P.A, Osiyemi JA, Banjo TT. Clonal diversity and spatial dissemination of multi-  
467 antibiotics resistant *Staphylococcus aureus* pathotypes in Southwest Nigeria. *PLoS One*.  
468 2021;16(2):e0247013. doi:10.1371/journal.pone.0247013
- 469 36. Li Y. Molecular epidemiology of yellow fever virus in Africa: A perspective of the  
470 phylogeographic split between East/Central African and West African lineages. *Acta  
471 tropica*, 2022. 225, 106199. <https://doi.org/10.1016/j.actatropica.2021.106199>.

- 472 37. Vasconcelos PF, Bryant JE, da Rosa TP, Tesh RB, Rodrigues SG, Barrett ADT. Genetic  
473 divergence and dispersal of yellow fever virus, Brazil. *Emerg Infect Dis.* 2004. 10: 1578–  
474 1.
- 475 38. Moreira-Soto A, Torres MC, Mendonça MCL de, Mares-Guia MA, Rodrigues CD dos  
476 S, Fabri AA, DosSantos CC, Fisher C, Ribeirio Nogueira RM, Drosten C, Drexler JF,  
477 Bispo de Filipo AM. Evidence for multiple sylvatic transmission cycles during the  
478 2016–2017 yellow fever virus outbreak, Brazil. *Clinical Microbiology and Infection.*  
479 2018; 24: 1019.e1–1019.e4.
- 480 39. Hill, SC., de Souza, R., Thézé, J., Claro, I., Aguiar, RS., Abade, L., Santos, FC.  
481 FlaviaC, Salles FCS, Rocco IM, Maeda AY, Vasami FG, Plessis L, Silveira PP,  
482 Quick J, Guerra JM, Réssio RA, Giovanetti M, Alcantara LCJ, Cirqueira CS, Díaz-  
483 Delgado J, Macedo FLL, Timenetsky MST, Mucci LF, Tubaki RM, de Menezes R,  
484 Ramos P, Cruz LN, Loman N, Dellicour S, Pybus OG, Ester Sabino EC, Faria NR.  
485 Genomic Surveillance of Yellow Fever Virus Epizootic in São Paulo, Brazil, 2016 -  
486 2018. *PLoS pathogens*, 2020. 16(8), e1008699.  
487 <https://doi.org/10.1371/journal.ppat.1008699>
- 488
- 489
- 490
- 491
- 492
- 493
- 494



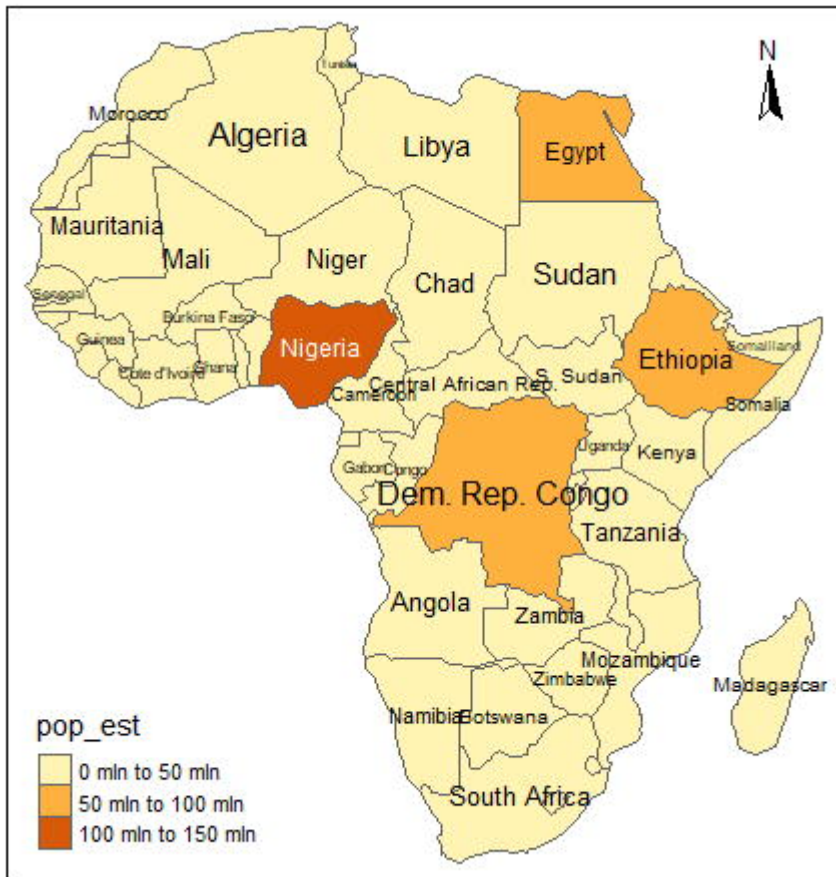

**A**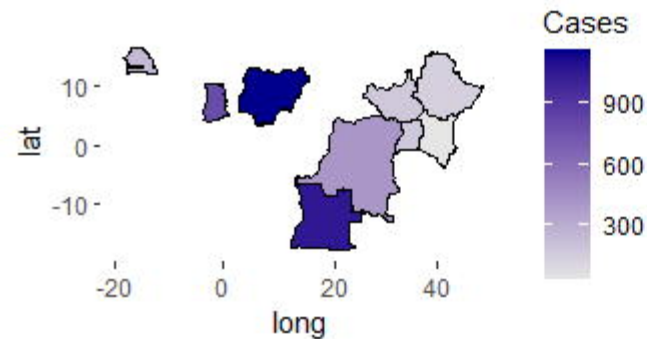**B**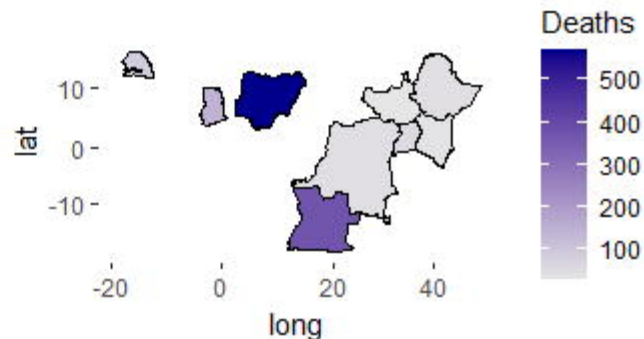**C**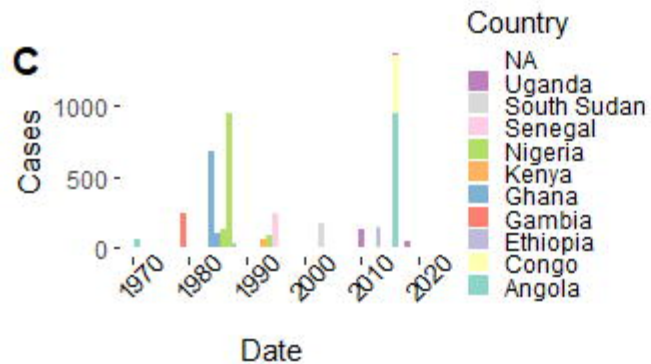**D**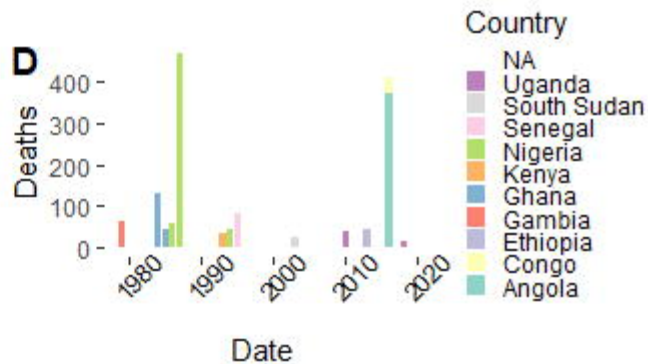

Tree scale: 0.1

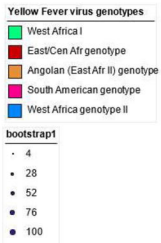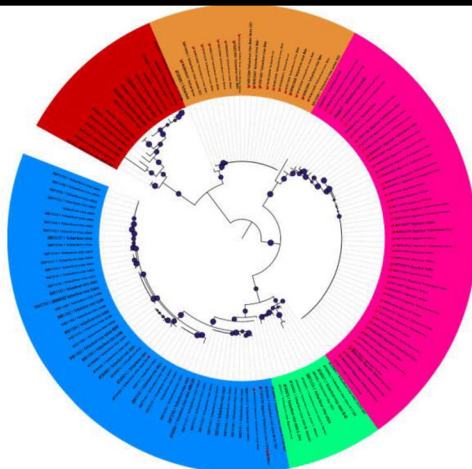

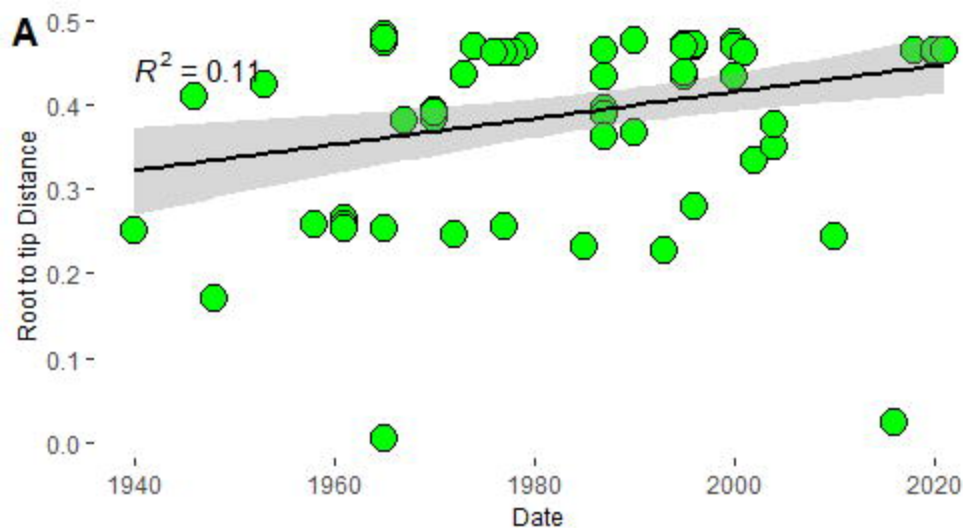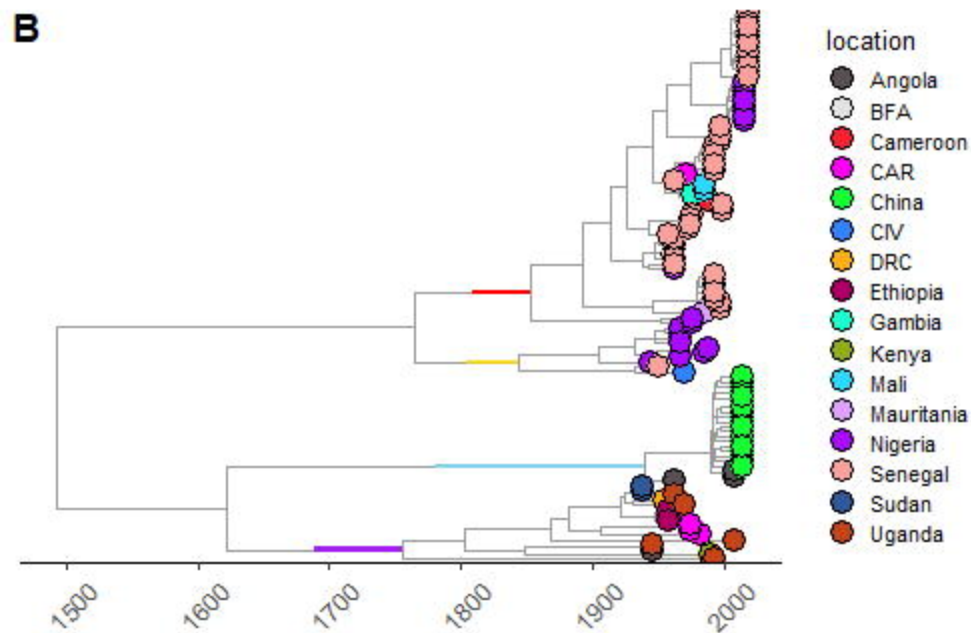

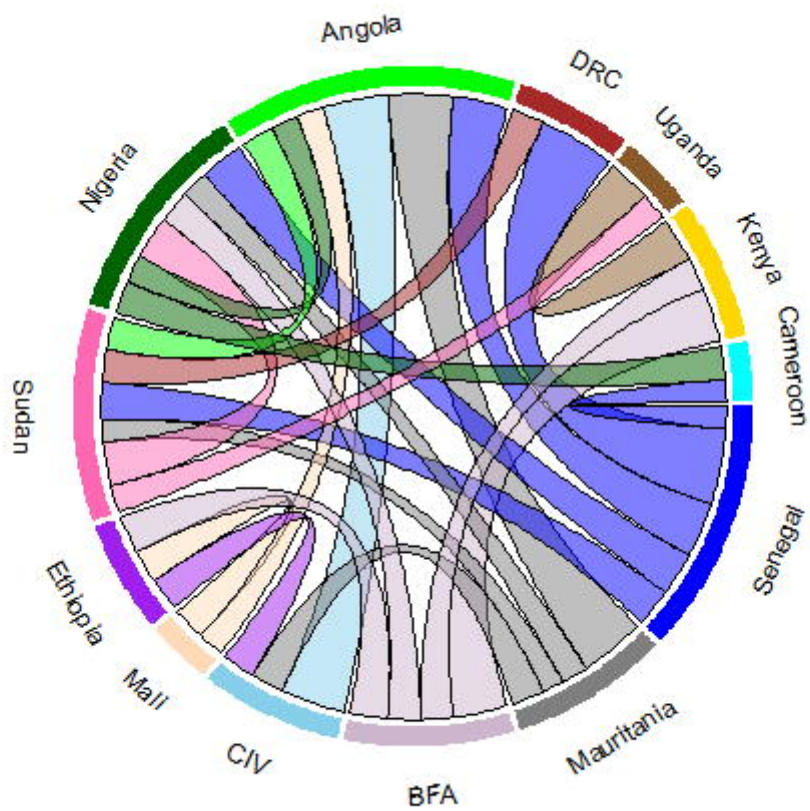

A

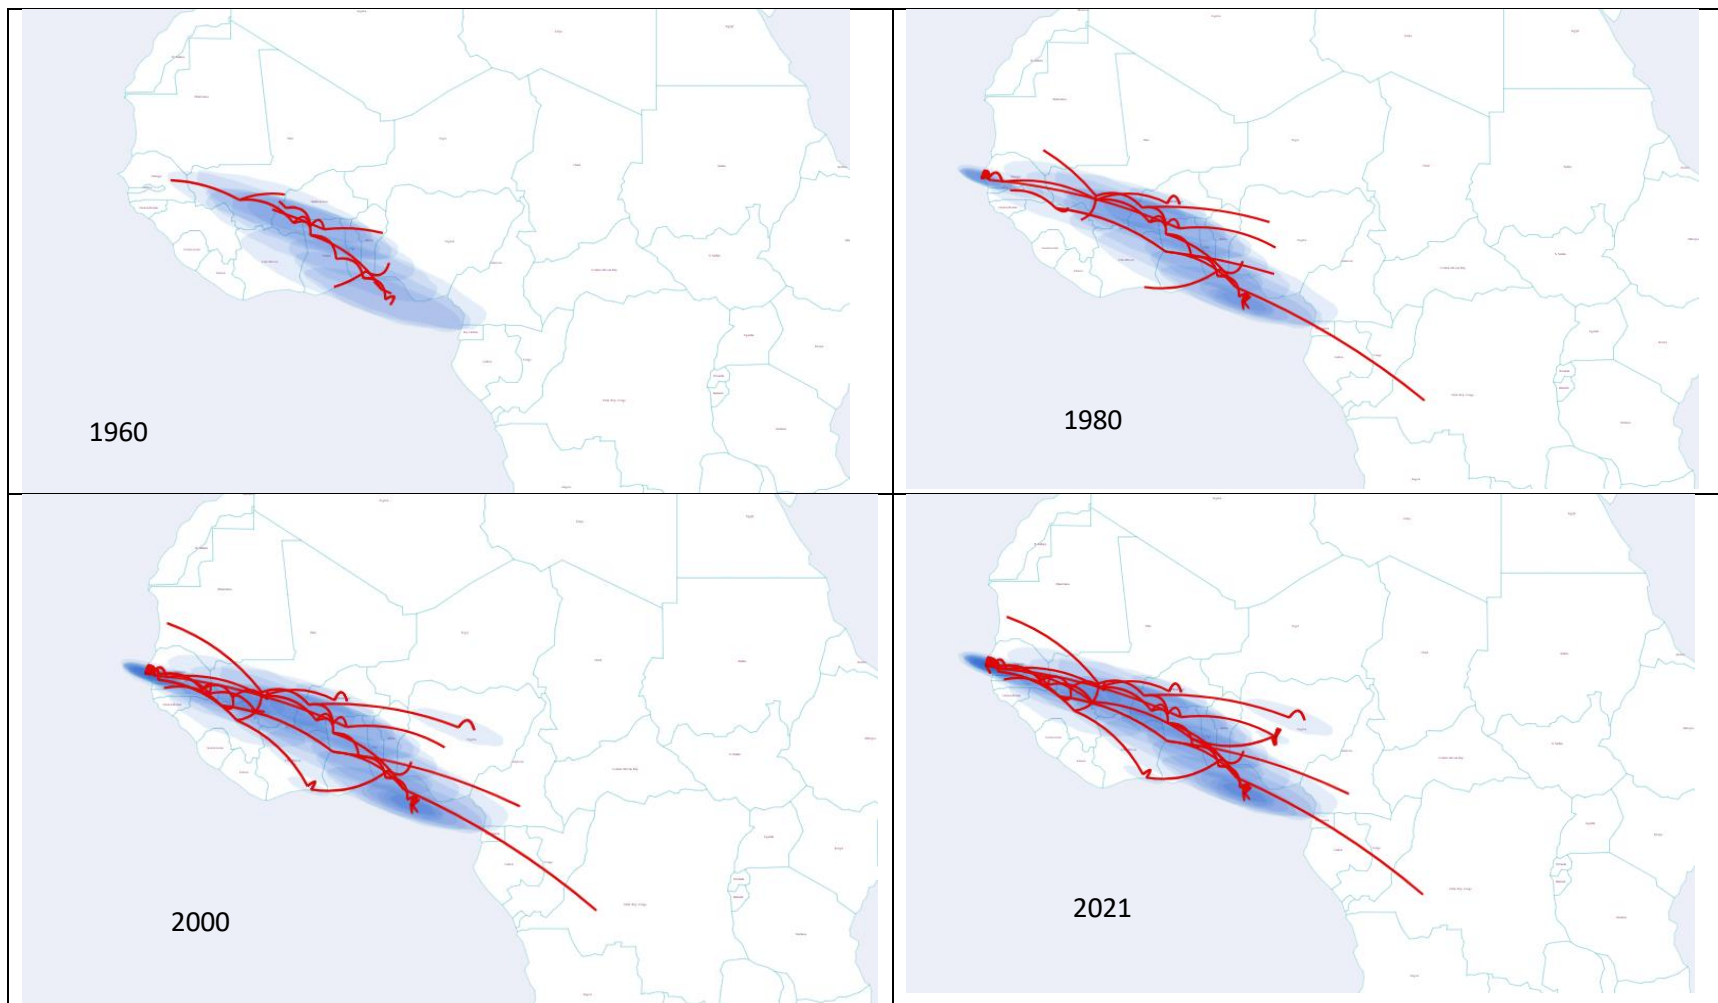

— Movement path of YF virus



**B**

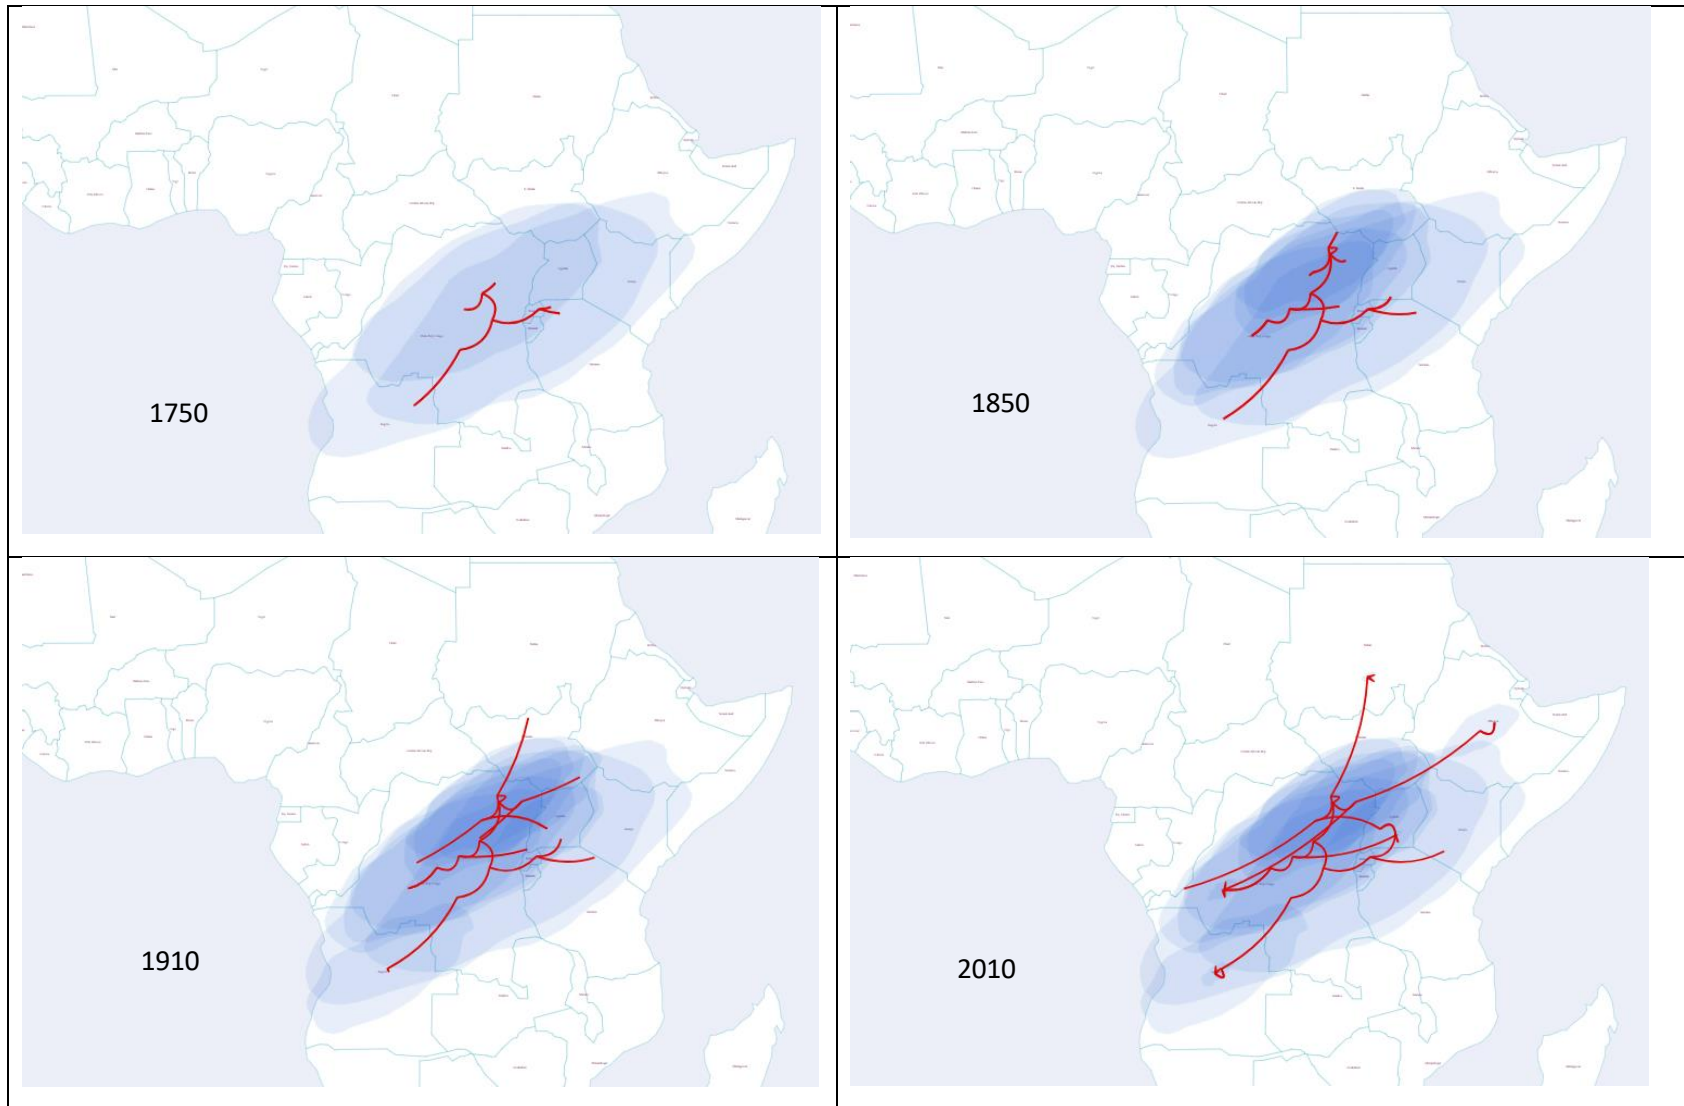

Source: https://medrxiv.org/content/10.1101/2023.06.06.23291042.full.pdf
